# Supplementary material for: Sequencing and De Novo Assembly of the Gonadal Transcriptome of the Endangered Chinese Sturgeon (Acipenser sinensis)
Source: PLoS One. 2015 Jun 1;10(6):e0127332. doi: 10.1371/journal.pone.0127332 (PMC4452307; doi:10.1371/journal.pone.0127332)
Supplement: S4 Table — (XLSX) [file pone.0127332.s005.xlsx]

## Sheet: Sheet1
Table S4 Genes with potential function in gametogenesis found in A. sinensis transcriptome
Gene symbol	Gene name	Unigene ID	Putative role	Ovary expression (RPKM)	Testis expression (RPKM)	Reference
amh	anti-mullerian hormone	Reproduction_Unigene_BMK.77343	Male sex differentiation	4397	43073	SRef1 and SRef2
amhr2	anti-mullerian hormone receptor 2		Male sex differentiation			SRef3
ar	androgen receptor	Reproduction_Unigene_BMK.77687	Male sex differentiation	203	1987	SRef4
atrx	alpha thalassemia/mental retardation syndrome X-linked	Reproduction_Unigene_BMK.78716	Sexual development	543	5337	SRef5
bmp15	bone morphogenetic protein 15	Reproduction_Unigene_BMK.76427	early ovarian follicle growth	815	133	SRef6
ctnnb1	catenin b-1		Female sex determination			SRef7
cyp11b	11b-hydroxylase		Sexual development			SRef7
cyp19a1a	testicular P450 aromatase	Reproduction_Unigene_BMK.81877	Female sex differentiation	2	0	SRef7
dax1	Nr0b1, nuclear receptor subfamily 0, group B, member 1		Male sex determination			SRef8
dhh	desert hedgehog		Male sex determination			SRef7
dmc1	DNA meiotic recombinase 1	Reproduction_Unigene_BMK.57389	Meiosis specific marker	7	1074	SRef9
dmrt1	double sex and mab-3 related transcription factor 1	Reproduction_Unigene_BMK.69648	Male sex determination	181	551	SRef10 and SRef11
dmrt3	double sex and mab-3 related transcription factor 3	Reproduction_Unigene_BMK.45598	Testis development	0	2	SRef11 and SRef12
dmrt5	doublesex- and mab-3-related transcription factor 5	Reproduction_Unigene_BMK.54809	Sexual development	55	15	SRef12
dmrt6	double sex and mab-3 related transcription factor 6		Sexual development			SRef7 and SRef12
emx2	empty spiracles homeobox 2	Reproduction_Unigene_BMK.68553	Sexual development	6	44	SRef7
erα, erβ	oestrogen receptor α and β		Female sex differentiation			SRef7
fem1a	fem-1 homolog a (C. elegans)	Reproduction_Unigene_BMK.73495	Sexual development	108	232	SRef5
fgf9	fibroblast growth factor 9		Male sex determination			SRef5
fgfr2	fibroblast growth factor receptor 2	Reproduction_Unigene_BMK.67015	Sexual development	71	1351	SRef5
fhl3	four and a half LIM domains 3	Reproduction_Unigene_BMK.74865	Sexual development	4994	328	SRef5
fsh	follicle-stimulating hormone	Reproduction_Unigene_BMK.44997	Reproduction regulation	44	29	SRef13 and SRef14
fshr	follicle-stimulating hormone receptor	Reproduction_Unigene_BMK.76017	Reproduction regulation	39	2422	SRef13 and SRef14
foxl2	forkhead box L2	Reproduction_Unigene_BMK.32575	Female sex determination	1	0	SRef15
fst	follistatin	Reproduction_Unigene_BMK.62483	female sex determination	92	752	SRef7
gata4	GATA-binding protein 4	Reproduction_Unigene_BMK.75431	Bipotential gonad development	237	3021	SRef5 and SRef7
gnrh	gonadotropin-releasing hormone	Reproduction_Unigene_BMK.35592	Reproduction regulation	8	30	SRef13 and SRef14
gnrhr	gonadotropin-releasing hormone receptor	Reproduction_Unigene_BMK.12874	Reproduction regulation	2	0	SRef13 and SRef14
gsdf	gonadal soma derived factor	Reproduction_Unigene_BMK.34956	Male sex determination	7710	21942	SRef16, SRef17 and SRef18
igf-I	insulin-like growth factor I	Reproduction_Unigene_BMK.14837	spermatogenesis, Leydig cell differentiation and proliferation	0	2	SRef19 and SRef20
igfIr	insulin-like growth factor I receptor	Reproduction_Unigene_BMK.74749	spermatogenesis, Leydig cell differentiation and proliferation	364	1218	SRef19 and SRef20
lhx1	LIM homeobox 1	Reproduction_Unigene_BMK.83699	Sexual development	0	8	SRef5
lhx9	LIM homeobox 9		Sexual development			SRef5
nanos3b	nanos homolog 3b (Drosophila)	Reproduction_Unigene_BMK.37121	Maintenance of the undifferentiated state of spermatogonia	70	0	SRef21
oct4 (pou2)	octamer binding protein 4 (class V POU family gene 2)	Reproduction_Unigene_BMK.73936	Maintenance of the undifferentiated state of spermatogonia	1860	33	SRef22
pdgf	Platelet-derived growth factor		Sexual development			SRef23, SRef24 and SRef25
pdgfr-α	Platelet-derived growth factor receptor alpha		Sexual development			SRef7 and SRef23
pdgfr-β	Platelet-derived growth factor receptor beta	Reproduction_Unigene_BMK.62139	Sexual development	18	93	SRef7 and SRef23
rspo-1	R-spondin homologue 1		Female sex determination			SRef5 and SRef7
sdY	sexually dimorphic gene on the Y chromosome		Male sex determination			SRef26
sf-1	Steroidogenic Factor 1 (nuclear receptor subfamily 5, group A, member 1)		Bipotential gonad development			SRef5
sox1	SRY (sex determining region Y)-box 1		Sexual development			SRef5
sox3	SRY (sex determining region Y)-box 3	Reproduction_Unigene_BMK60411	Maintenance of the undifferentiated state of spermatogonia	331	68	SRef27
sox4	SRY (sex determining region Y)-box 4	Reproduction_Unigene_BMK.67239	Sexual development	54	621	SRef5
sox6	SRY (sex determining region Y)-box 6		Sexual development			SRef5
sox9	Sry box-containing gene 9	Reproduction_Unigene_BMK.79398	Male sex determination	491	769	SRef28
sox11	SRY-box containing gene 11	Reproduction_Unigene_BMK.6537	Sexual development	0	9	SRef5
sox17	SRY (sex determining region Y)-box 17	Reproduction_Unigene_BMK.55171	Sexual development	12	68	SRef5
spo11	meiotic protein covalently bound to DSB	Reproduction_Unigene_BMK.67862	Meiosis specific marker	310	609	SRef9
srd5a1, srd5a2, srd5a3	5α-reductase 1, 2, and 3		Sexual development			SRef7, SRef29 and SRef30
wnt4	Wingless-type MMTV integration site family member 4		Female sex determination			SRef7
wt1	Wilms tumor 1	Reproduction_Unigene_BMK.80243	Bipotential gonad development	5	78	SRef8
Supplemental references:
SRef1. Pala I, Kluver N, Thorsteinsdottir S, Schartl M, Coelho MM (2008) Expression pattern of anti-Mullerian hormone (amh) in the hybrid fish complex of Squalius alburnoides. Gene 410: 249-258.
SRef2. Hattori RS, Murai Y, Oura M, Masuda S, Majhi SK, et al. (2012) A Y-linked anti-Mullerian hormone duplication takes over a critical role in sex determination. Proc Natl Acad Sci U S A 109: 2955-2959.
SRef3. Kamiya T, Kai W, Tasumi S, Oka A, Matsunaga T, et al. (2012) A trans-species missense SNP in Amhr2 is associated with sex determination in the tiger pufferfish, Takifugu rubripes (fugu). PLoS Genet 8: e1002798.
SRef4. Borg B (1994) Androgens in teleost fishes. Comp Biochem Physiol C Pharmacol Toxicol Endocrinol 109: 219-245.
SRef5. Vidotto M, Grapputo A, Boscari E, Barbisan F, Coppe A, et al. (2013) Transcriptome sequencing and de novo annotation of the critically endangered Adriatic sturgeon. BMC Genomics 14: 407.
SRef6. Ziv T, Gattegno T, Chapovetsky V, Wolf H, Barnea E, et al. (2008) Comparative proteomics of the developing fish (zebrafish and gilthead seabream) oocytes. Comp Biochem Physiol Part D Genomics Proteomics 3: 12-35.
SRef7. Forconi M, Canapa A, Barucca M, Biscotti MA, Capriglione T, et al. (2013) Characterization of sex determination and sex differentiation genes in Latimeria. PLoS One 8: e56006.
SRef8. Pala I, Schartl M, Thorsteinsdottir S, Coelho MM (2009) Sex determination in the Squalius alburnoides complex: an initial characterization of sex cascade elements in the context of a hybrid polyploid genome. PLoS One 4: e6401.
SRef9. Schulz RW, de Franca LR, Lareyre JJ, Le Gac F, Chiarini-Garcia H, et al. (2010) Spermatogenesis in fish. Gen Comp Endocrinol 165: 390-411.
SRef10. Nanda I, Kondo M, Hornung U, Asakawa S, Winkler C, et al. (2002) A duplicated copy of DMRT1 in the sex-determining region of the Y chromosome of the medaka, Oryzias latipes. Proc Natl Acad Sci U S A 99: 11778-11783.
SRef11. El-Mogharbel N, Wakefield M, Deakin JE, Tsend-Ayush E, Grutzner F, et al. (2007) DMRT gene cluster analysis in the platypus: new insights into genomic organization and regulatory regions. Genomics 89: 10-21.
SRef12. Kim S, Kettlewell JR, Anderson RC, Bardwell VJ, Zarkower D (2003) Sexually dimorphic expression of multiple doublesex-related genes in the embryonic mouse gonad. Gene Expr Patterns 3: 77-82.
SRef13. Taranger GL, Carrillo M, Schulz RW, Fontaine P, Zanuy S, et al. (2010) Control of puberty in farmed fish. Gen Comp Endocrinol 165: 483-515.
SRef14. Chang JP, Johnson JD, Sawisky GR, Grey CL, Mitchell G, et al. (2009) Signal transduction in multifactorial neuroendocrine control of gonadotropin secretion and synthesis in teleosts-studies on the goldfish model. Gen Comp Endocrinol 161: 42-52.
SRef15. Pisarska MD, Barlow G, Kuo FT (2011) Minireview: roles of the forkhead transcription factor FOXL2 in granulosa cell biology and pathology. Endocrinology 152: 1199-1208.
SRef16. Shibata Y, Paul-Prasanth B, Suzuki A, Usami T, Nakamoto M, et al. (2010) Expression of gonadal soma derived factor (GSDF) is spatially and temporally correlated with early testicular differentiation in medaka. Gene Expr Patterns 10: 283-289.
SRef17. Gautier A, Sohm F, Joly JS, Le Gac F, Lareyre JJ (2011) The proximal promoter region of the zebrafish gsdf gene is sufficient to mimic the spatio-temporal expression pattern of the endogenous gene in Sertoli and granulosa cells. Biol Reprod 85: 1240-1251.
SRef18. Myosho T, Otake H, Masuyama H, Matsuda M, Kuroki Y, et al. (2012) Tracing the emergence of a novel sex-determining gene in medaka, Oryzias luzonensis. Genetics 191: 163-170.
SRef19. Wuertz S, Gessner J, Kirschbaum F, Kloas W (2007) Expression of IGF-I and IGF-I receptor in male and female sterlet, Acipenser ruthenus--evidence for an important role in gonad maturation. Comp Biochem Physiol A Mol Integr Physiol 147: 223-230.
SRef20. Wuertz S, Nitsche A, Jastroch M, Gessner J, Klingenspor M, et al. (2007) The role of the IGF-I system for vitellogenesis in maturing female sterlet, Acipenser ruthenus Linnaeus, 1758. Gen Comp Endocrinol 150: 140-150.
SRef21. Lolicato F, Marino R, Paronetto MP, Pellegrini M, Dolci S, et al. (2008) Potential role of Nanos3 in maintaining the undifferentiated spermatogonia population. Dev Biol 313: 725-738.
SRef22. Ohbo K, Yoshida S, Ohmura M, Ohneda O, Ogawa T, et al. (2003) Identification and characterization of stem cells in prepubertal spermatogenesis in mice. Dev Biol 258: 209-225.
SRef23. Gnessi L, Emidi A, Jannini EA, Carosa E, Maroder M, et al. (1995) Testicular development involves the spatiotemporal control of PDGFs and PDGF receptors gene expression and action. J Cell Biol 131: 1105-1121.
SRef24. Gnessi L, Basciani S, Mariani S, Arizzi M, Spera G, et al. (2000) Leydig cell loss and spermatogenic arrest in platelet-derived growth factor (PDGF)-A-deficient mice. J Cell Biol 149: 1019-1026.
SRef25. Smith CA, McClive PJ, Hudson Q, Sinclair AH (2005) Male-specific cell migration into the developing gonad is a conserved process involving PDGF signalling. Dev Biol 284: 337-350.
SRef26. Yano A, Guyomard R, Nicol B, Jouanno E, Quillet E, et al. (2012) An immune-related gene evolved into the master sex-determining gene in rainbow trout, Oncorhynchus mykiss. Curr Biol 22: 1423-1428.
SRef27. Raverot G, Weiss J, Park SY, Hurley L, Jameson JL (2005) Sox3 expression in undifferentiated spermatogonia is required for the progression of spermatogenesis. Dev Biol 283: 215-225.
SRef28. McClelland K, Bowles J, Koopman P (2012) Male sex determination: insights into molecular mechanisms. Asian J Androl 14: 164-171.
SRef29. O'Donnell L, Stanton PG, Wreford NG, Robertson DM, McLachlan RI (1996) Inhibition of 5 alpha-reductase activity impairs the testosterone-dependent restoration of spermiogenesis in adult rats. Endocrinology 137: 2703-2710.
SRef30. Zaccanti F, Petrini S, Rubatta ML, Stagni AM, Giorgi PP (1994) Accelerated female differentiation of the gonad by inhibition of steroidogenesis in amphibia. Comp Biochem Physiol A Physiol 107: 171-179.
